# Supplementary material for: From Water to Land: The Structural Construction and Molecular Switches in Lungs during Metamorphosis of Microhyla fissipes
Source: Preprints.org preprint supplement (doi:10.20944/preprints202201.0295.v1), 2022-01-20
Supplement: Supplementary file 1 [file supplementary]

Table S1. Developmental phase information of each sample

| Sample | Pro-metamorphosis | Metamorphosis Climax | Post-metamorphosis | Adult |
| --- | --- | --- | --- | --- |
| L1_1 | 1 | 0 | 0 | 0 |
| L1_2 | 1 | 0 | 0 | 0 |
| L1_3 | 1 | 0 | 0 | 0 |
| L2_1 | 2 | 0 | 0 | 0 |
| L2_2 | 2 | 0 | 0 | 0 |
| L2_3 | 2 | 0 | 0 | 0 |
| L3_1 | 3 | 0 | 0 | 0 |
| L3_2 | 3 | 0 | 0 | 0 |
| L3_3 | 3 | 0 | 0 | 0 |
| L4_1 | 0 | 1 | 0 | 0 |
| L4_2 | 0 | 1 | 0 | 0 |
| L4_3 | 0 | 1 | 0 | 0 |
| L5_1 | 0 | 0 | 1 | 0 |
| L5_2 | 0 | 0 | 1 | 0 |
| L5_3 | 0 | 0 | 1 | 0 |
| L6_1 | 0 | 0 | 0 | 1 |
| L6_2 | 0 | 0 | 0 | 1 |
| L6_3 | 0 | 0 | 0 | 1 |
